1 **The impacts of landscape composition, marginality, and climatic stability on the**  
2 **patterns of endemism of Cerrado woody plants**

3

4 **Running title:** Endemism and climate of the Cerrado

5

6 João de Deus Vidal Júnior<sup>1</sup>, Anete Pereira de Souza<sup>\*1,2</sup> & Ingrid Koch<sup>2</sup>

7

8 <sup>1</sup>Center of Molecular Biology and Genetic Engineering (CBMEG), Universidade Estadual de

9 Campinas (UNICAMP), Campinas, Brazil

10 <sup>2</sup> Plant Biology Department, Biology Institute, Universidade Estadual de Campinas

11 (UNICAMP), Campinas, Brazil

12 \*Email: [jd.vidal27@gmail.com](mailto:jd.vidal27@gmail.com)

13

14 **Corresponding author:**

15 Anete Pereira de Souza,

16 Plant Biology Department, Biology Institute, UNICAMP, 13083-862, Campinas, SP, Brazil

17 Telephone number: +55 19-3521-1132 31 Fax number: +55 19-3521-1089

18 E-mail: [anete@unicamp.br](mailto:anete@unicamp.br)

19

20 **Acknowledgements:**

21 This work was supported by Coordenação de Aperfeiçoamento de Pessoal de Nível Superior

22 (CAPES) in the form of a scholarship to J.D. Vidal. This research was also supported by

23 CAPES - Computational Biology Program.

24 We would like to thank professors Fábio Pinheiro and Paulo De Marco Júnior for reading and

25 suggesting important improvements to the manuscript.

26

27 **Conflict of interest:**

28 The authors have no conflicts of interest to declare.

29

30 **Author contributions:**

31 JDV designed the study, performed the analysis, and wrote the manuscript; APS and IK

32 assisted with the discussion of results and wrote the manuscript.

33

34 **Biosketch**

35 João de Deus Vidal Jr. is a postdoctoral researcher in the Laboratory of Genetics and  
36 Molecular Analysis at Universidade Estadual de Campinas. He is interested in spatial patterns  
37 of diversity of Neotropical plants, with a special focus on the role of past climatic changes in  
38 the generation of modern patterns of diversity, at both community and population levels.

39 Ingrid Koch is a professor at the Institute of Plant Biology of Universidade Estadual de  
40 Campinas. She is interested in the systematics, evolution and species distribution of plants  
41 from Neotropical environments. Anete Pereira de Souza is a professor at the Institute of Plant  
42 Biology of Universidade Estadual de Campinas. She is interested in the population genetics  
43 and molecular evolution of plants, with an emphasis on bioinformatics and genome evolution.

44

45 **ABSTRACT**

46 **Aim:** Many theories were proposed to explain the outstanding endemism of plants in the  
47 Cerrado. Among the diversification mechanics suggested, the most widely discussed are the  
48 plateau/valley, stable/unstable, and core/peripheral hypotheses. The first argues that plateaus  
49 harbor more ancient lineages than valleys and should therefore present higher levels of  
50 endemism. The second theory suggests that climate stability in certain regions promoted  
51 more suitable environments for the maintenance of paleoendemic species. The last scenario  
52 attributes the distribution of endemism in the Cerrado to gradients of optimal conditions  
53 available to locally adapted species, predicting higher endemism levels in core regions of the  
54 domain than in marginal areas. We compared the endemism patterns of Cerrado flora with  
55 the predictions of each theory to discuss their role in the distribution of endemism nuclei  
56 across the domain.

57 **Location:** Brazil.

58 **Time period:** Quaternary.

59 **Major taxa studied:** Angiosperms.

60 **Methods:** We generated an endemism map using records of 174 woody plant species,  
61 comprising most vegetation types of the Cerrado domain. We applied spatial analysis and  
62 distribution models to summarize the importance of each predictor of endemism.

63 **Results:** We found correlations among endemism, elevation, and marginality, supporting the  
64 plateau/valley and core/peripheral hypotheses. Although plateaus are more stable climatic  
65 environments, their elevation and centrality, not their climatic stability, predict higher  
66 endemism. Our vegetation models using simulated datasets supported the expansion of  
67 Cerrado plateau vegetation and retraction in valleys during the Last Glacial. However, real  
68 occurrence data models for gallery and riverine forests indicated that species in valleys  
69 presented contrasting responses to past climatic shifts.

70 **Main conclusions:** We identified regions of higher plant endemism within the Cerrado  
71 domain and verified elevation and centrality as stronger predictive factors of this endemism  
72 compared with climatic stability. Our results also indicate that different vegetation types  
73 within valleys presented different responses to the Quaternary climate.

74

75 **Keywords:** Biogeography, Community ecology, Species distribution modeling, Last Glacial

76 Maximum, Savanna, SDTF

77

78 **ABSTRACT**

79 **Aim:** Many theories were proposed to explain the outstanding endemism of plants in the  
80 Cerrado. Among the diversification mechanics suggested, the most widely discussed are the  
81 plateau/valley, stable/unstable, and core/peripheral hypotheses. The first argues that plateaus  
82 harbor more ancient lineages than valleys and should therefore present higher levels of  
83 endemism. The second theory suggests that climate stability in certain regions promoted  
84 more suitable environments for the maintenance of paleoendemic species. The last scenario  
85 attributes the distribution of endemism in the Cerrado to gradients of optimal conditions  
86 available to locally adapted species, predicting higher endemism levels in core regions of the  
87 domain than in marginal areas. We compared the endemism patterns of Cerrado flora with  
88 the predictions of each theory to discuss their role in the distribution of endemism nuclei  
89 across the domain.

90 **Location:** Brazil.

91 **Time period:** Quaternary.

92 **Major taxa studied:** Angiosperms.

93 **Methods:** We generated an endemism map using records of 174 woody plant species,  
94 comprising most vegetation types of the Cerrado domain. We applied spatial analysis and  
95 distribution models to summarize the importance of each predictor of endemism.

96 **Results:** We found correlations among endemism, elevation, and marginality, supporting the  
97 plateau/valley and core/peripheral hypotheses. Although plateaus are more stable climatic  
98 environments, their elevation and centrality, not their climatic stability, predict higher  
99 endemism. Our vegetation models using simulated datasets supported the expansion of  
100 Cerrado plateau vegetation and retraction in valleys during the Last Glacial. However, real  
101 occurrence data models for gallery and riverine forests indicated that species in valleys  
102 presented contrasting responses to past climatic shifts.

103 **Main conclusions:** We identified regions of higher plant endemism within the Cerrado  
104 domain and verified elevation and centrality as stronger predictive factors of this endemism  
105 compared with climatic stability. Our results also indicate that different vegetation types  
106 within valleys presented different responses to the Quaternary climate.

107

108 **Keywords:** Biogeography, Community ecology, Species distribution modeling, Last Glacial  
109 Maximum, Savanna, Plateaus, Valleys.

110

## 111 INTRODUCTION

112 The Cerrado is the largest savanna and the second largest major bioregion in South  
113 America, with a complex and unique biogeographic history. The Cerrado harbors more plant  
114 species than any other savanna in the world (> 7000 species; Mendonça et al., 1998), with  
115 over 44% of its flora being endemic, making it the richest tropical savanna in the world in  
116 this regard (Klink & Machado, 2005). The Cerrado landscape is divided into ancient plateaus,  
117 which are large extension areas with relatively high elevations (500–1700 m), and peripheral  
118 valleys, which are lower elevation regions (100–500 m) that surround the highlands (Silva,  
119 1997; Silva & Bates, 2002). These landscape unities present different biotic compositions and  
120 geological histories, indicating that their biogeographical histories were also distinct. The  
121 biota of valleys is heterogeneous, composed of gallery, riverine, and dry forests, marshlands,  
122 and enclaves of species from adjacent biomes (Silva & Bates, 2002), while plateaus present  
123 the savanna as a dominant vegetation type (Silva, 1997).

124 The outstanding diversity of plant species in the Cerrado is a topic of present  
125 discussion in Neotropical biogeography. Many theories have been proposed to explain the  
126 high degree of endemism found for several taxa, but due to the variety of responses of  
127 organisms and the limited studies concerning this environment (Turchetto-Zolet, Pinheiro,  
128 Salgueiro, & Palma-Silva, 2013), no prevailing process acting on the biogeographic history  
129 of this domain has emerged thus far. Regarding the currently discussed theories, three  
130 particular hypotheses of diversification are the most supported scenarios: (1) the geographic  
131 compartmentalization of the landscape in highlands and depressions of the Late Miocene as a  
132 driver of allopatric speciation between disjoint landscape units; (2) the differences in  
133 Pleistocene climatic stability along regions within the domain promoting the differential  
134 maintenance of diversity in stable and unstable regions; and (3) the gradient of optimal  
135 environmental conditions between the core and periphery of the Cerrado that promoted lower

136 extinction rates in nuclear regions, which favored the maintenance of endemism in the center  
137 of the domain. Although they are not mutually exclusive, the relative importance of these  
138 theories remains a major focus of debate because most individual patterns of taxa seem to  
139 support different scenarios (e.g., Turchetto-Zolet et al., 2013).

140         The first hypothesis attributes differential endemism across the Cerrado to the older  
141 geological origin of plateau formations, which date from the Late Tertiary, while valleys are  
142 the result of recent erosive processes (Ab'Sáber, 1983; Silva, 1997; Werneck, 2011). Given  
143 this scenario, ancient geomorphological processes acting on these environments might have  
144 promoted the isolation of older lineages in the highlands. Consequently, the recently formed  
145 valleys were gradually occupied by neoendemic species (Silva, 1997). Therefore, for this  
146 hypothesis, higher elevation regions are expected to present more endemism than  
147 depressions. This model is consistent with endemism patterns reported for birds (Silva,  
148 1997), plants of the genus *Mimosa* (Simon & Proença, 2000), and squamate lizards  
149 (Nogueira, Ribeiro, & Costa, 2011).

150         In addition to the geomorphological processes of the Late Miocene, the Pleistocene  
151 climate was also proposed as a major driver of diversification of species and lineages within  
152 the Cerrado (Werneck, Nogueira, Colli, Sites, & Costa, 2012; Santos, Nogueira, & Giugliano,  
153 2014; Bueno et al., 2017; Arruda, Schaefer, Fonseca, Solar, & Fernandes-Filho, 2018; Costa  
154 et al., 2018). This hypothesis is closely associated with both plateau/valley and  
155 core/periphery hypotheses, as both valleys (Ab'Sáber, 1983) and marginal regions (Costa et  
156 al., 2018) of the Cerrado were more sensitive to Quaternary climatic shifts than highlands or  
157 the central regions of the domain, as suggested by their pollen record and the frequent  
158 presence of species from adjacent biomes (Ledru, 2002; Costa et al., 2018). In this scenario,  
159 during cycles of cold and dry climates, the distribution of moist vegetation from valley  
160 environments underwent strong retractions. By contrast, the plateau vegetation expanded into



161 valleys, possibly even penetrating the modern distribution of adjacent domains (van der  
162 Hammen, 1974). Indeed, stable climatic regions are considered to predict diversity at both  
163 interspecific (Werneck, 2011) and intraspecific levels (Carnaval & Moritz, 2008; Carnaval,  
164 Hickerson, Haddad, Rodrigues, & Moritz, 2009), as areas presenting less stable  
165 environmental conditions are more prone to face local extinction (Harrison & Noss, 2017).

166 The third hypothesis argues that core regions of the Cerrado historically presented  
167 relatively more optimal conditions for the maintenance of regionally adapted populations of  
168 its species, supporting the diversification of endemics through time (Soule, 1973; Eckert,  
169 Samis, & Lougheed, 2008). In this scenario, nuclear regions of the Cerrado are expected to  
170 show higher levels of endemism, whereas communities in peripheral regions are more prone  
171 to undergo stochastic events of local extinction, given the exposure of populations of species  
172 to sub-optimal conditions in comparison with nuclear regions (Soule, 1973). An example  
173 supporting this scenario is the genetic diversity of populations of the squamate lizards of the  
174 genus *Micrablepharus* (Santos et al., 2014).

175 Multiple species niche models are useful for detecting general patterns, which are  
176 important for assembling large-scale scenarios. Large-scale hypothesis testing for the  
177 identification of refugia has been conducted for several regions around the world, with  
178 important biogeographic outcomes (Thuiller, 2004; Svenning, Normand, & Kageyama,  
179 2008). Mostly, single species patterns or simulated dataset models have been applied in past  
180 distributional reconstructions for the Cerrado (Collevatti et al., 2012; Werneck et al., 2012;  
181 Lima, Telles, Chaves, & Lima-Ribeiro, 2017; Arruda et al., 2018), while multiple species  
182 approaches are less common (de Siqueira & Peterson, 2003; Bonaccorso, Koch, & Peterson  
183 2006; Bueno et al., 2017). These studies addressed future climatic changes based on a  
184 conservation biology approach (de Siqueira & Peterson, 2003), simulated the history of  
185 Amazonian forest fragmentation and the potential occupation of open areas by Cerrado

186 species (Bonaccorso et al., 2006) and reconstructed the distribution of woody savanna and  
187 seasonally dry tropical forests (SDTF) vegetation under past scenarios (Bueno et al., 2017).  
188 These studies also identified an important relationship between landscape composition and  
189 shifts in the distribution of the savanna during glaciations (Bueno et al., 2017). However,  
190 none of these studies included simulations that explicitly incorporated the differences in the  
191 abiotic and biotic compositions of valleys and plateaus. Here, we compared the levels of  
192 endemism of the woody flora of the Cerrado domain with the three scenarios proposed to  
193 explain its diversification. We tested whether higher elevations, central regions or  
194 climatically stable areas show higher levels of endemism. In addition, we modeled real and  
195 simulated occurrence data of woody plants from valley and plateaus to test the scenarios of  
196 retraction/expansion of different vegetation types occurring in these landscapes during glacial  
197 cycles.

198

## 199 **METHODS**

### 200 **Species occurrence data and endemism calculation**

201 To generate the maps of endemism for woody species of the Cerrado, we gathered  
202 occurrence data for 63 savanna species, 54 SDTF species, 36 gallery forest species, and 21  
203 riverine forest species (Table 1). We elaborated the species list for savanna, gallery and  
204 riverine forests based on the NeoTropTree database (Oliveira-Filho 2017), the Cerrado  
205 physiognomy description published by Ribeiro and Walter (1998), and the SDTF catalogue  
206 proposed by Prado and Gibbs (1993). The savanna list included species solely present in  
207 Cerrado arid woodlands following the NeoTropTree database. The SDTF species list  
208 included all valid species listed in Prado and Gibbs (1993), not considering infraspecific  
209 classification. The riverine forest species list and the gallery forest species list included  
210 typical species of each vegetation type, following the classification system proposed by

211 Ribeiro and Walter (1998). We considered riverine forests and gallery forests to be different  
212 vegetation types due to their composition and the restricted distribution of riverine forests in  
213 association with major rivers of the domain (Ribeiro & Walter, 1998; Silva & Bates, 2002).  
214 We excluded species present in multiple vegetation types to reduce the bias of widespread  
215 species in models. We retrieved species occurrence data from GBIF using the R package  
216 “rgbif” (Chamberlain, Ram, Barve, & Mcglinn, 2016). To ensure the quality of the data, we  
217 adopted search parameters that restrict data without original coordinates and with spatial  
218 issues. A full list of material data sources is presented in Appendix 2. We manually checked  
219 points by plotting individual maps and discarding outliers. We also discarded species with  
220 poor occurrence information or a low number of registries (< 10 registries).

221 We generated a map of weighted endemism using the algorithm proposed by Guerin,  
222 Ruokolainen, and Lowe (2015), applying a geographic grid with  $0.25 \times 0.25$  degrees cells to  
223 generate the presence/absence matrix. We calculated the number of unique species that  
224 occurred in each cell and weighted this statistic for each species by dividing it by the number  
225 of grid cells in which they occurred (Guerin et al., 2015). By doing so, we expected to reduce  
226 the bias of widespread generalist species in the estimates of endemism.

227

## 228 **Endemism correlation with elevation, marginality and climate**

229 To evaluate the relative climatic stability of plateaus and valleys, we divided the  
230 entire Cerrado domain into highlands ( $\geq 500$  m elevation) and depressions (< 500 m  
231 elevation). We randomly sampled 1000 points for each landscape unity and extracted values  
232 of 19 WorldClim bioclimatic variables (Hijmans, Cameron, Parra, Jones, & Jarvis, 2005) to  
233 compare the present environmental conditions between areas. To compare climatic stability,  
234 we sampled the same random points for past climatic scenarios (mid-Holocene, Last Glacial  
235 Maximum and Last Interglacial; Hijmans et al., 2005). We calculated the variances of each

236 environmental variable of plateaus and valleys and compared them using a bootstrap  
237 approach by sampling 1000 repetitions of the variances and comparing the significance of  
238 outcomes with Welch's t-test (Welch, 1938) for each variable in each landscape unit.

239 To test the correlation of endemism with elevation and marginality, we extracted  
240 values of elevation and distance from the Cerrado shape centroid for 1000 random points. We  
241 extracted the values of endemism for these same points and fitted them into linear models  
242 using Pearson's product-moment correlation test to estimate the significance of these  
243 associations. To test the relationship between endemism and stability, we fitted a generalized  
244 linear model with endemism as a response variable, with the variances of each of the 19  
245 bioclimatic variables between the present, mid-Holocene, LGM, and LIG as predictors, as  
246 well as elevation and distance to the core. We then compared the p-values of each predictor  
247 to discuss their relative importance.

248

#### 249 **Historical vegetation distribution**

250 To test the historical climate hypothesis, we assessed whether plateau vegetation  
251 expanded or retracted during glaciations and whether the response of valleys was the  
252 opposite, as proposed in the refugia scenario. We generated models for simulated points of  
253 valleys and plateaus and for the real occurrence of species associated with gallery forests,  
254 riverine forests, SDTF and savanna (Table 1). We sampled 1000 random points from all 19  
255 Worldclim bioclimatic variables to calculate Pearson's pairwise correlation and discard  
256 variables with a high correlation ( $\geq 0.75$ ). We obtained a set of 12 less correlated variables:  
257 annual precipitation, precipitation seasonality, precipitation of the driest quarter, precipitation  
258 of the warmest quarter, precipitation of the coldest quarter, mean diurnal range, isothermality,  
259 temperature seasonality, maximum temperature of the warmest month, mean temperature of  
260 the wettest quarter, mean temperature of the driest quarter, and elevation. For past scenarios

261 (mid-Holocene, Last Glacial Maximum and Last Interglacial), we used the variables from  
262 MIROC-ESM and CCSM4-scaled climatic models (Hijmans et al., 2005). We averaged  
263 models between both scenarios (MIROC-SM and CCSM4) and presented a consensus model  
264 for each of these time periods. For the Last Interglacial (LIG; ~120,000 – 140,000 years BP),  
265 we adopted a projection of bioclimatic values from WorldClim following Otto-Bliesner et al.  
266 (2006).

267 We used the maximum entropy machine-learning algorithm Maxent v. 3.3.3 (Phillips,  
268 Anderson, & Schapire, 2006) to model the potential distribution for each species and for the  
269 simulated datasets. We processed the models and bioclimatic layers using R packages  
270 “dismo” (Hijmans, Phillips, Leathwick, & Elith, 2013) and “raster” (Hijmans & van Etten,  
271 2014). For species distribution models, we used 1000 background points for each species to  
272 estimate background information with pseudo-absences. The model performance was  
273 evaluated by AUC-ROC values. We converted present models into binary models by  
274 establishing a threshold based on the lower presence training (LPT) value from which a  
275 presence point is recorded in the actual data for the present model (Pearson, Raxworthy,  
276 Nakamura, & Townsend Peterson, 2007). Then, we applied this same procedure to past  
277 scenarios using the present model threshold. We summarized information from models by  
278 counting per species presence cells for each scenario reconstruction. To facilitate comparison  
279 between species, we converted the values into percentages by dividing areas by the larger  
280 range registered for each species. In so doing, we were able to detect under which climatic  
281 scenario a species reached the maximum range of its distribution, and we were able to  
282 compare glacial and interglacial distributions of species. We also combined all binary  
283 models, for each species and for the whole dataset, to identify individual- and community-  
284 level stable areas. The same approach was implemented for the simulated datasets.

285

## 286 **RESULTS**

### 287 **Species list and endemism calculation**

288 In our survey, we obtained 9452 registries for 54 SDTF species, 1085 occurrence  
289 records for 21 riverine forest species, and 6903 records for 36 gallery forest species. For the  
290 savanna (*Cerrado sensu stricto*), we recovered 9145 occurrences for 63 species (Appendices  
291 S1, S2, S3 and S4). Our estimates of weighted endemism for the Cerrado domain returned  
292 higher levels of endemism in the states of Minas Gerais, Goiás, Mato Grosso, Mato Grosso  
293 do Sul, São Paulo, and Bahia (Figure 1). We were able to identify endemism nuclei in (1)  
294 Chapada dos Guimarães, (2) Serra do Roncador, (3) Araguaia Valley, (4) Chapada das Emas,  
295 (5) Serra dos Pirineus, (6) Chapada dos Veadeiros, (7) Chapada do São Francisco, (8)  
296 Planalto do Distrito Federal, (9) Serra do Cipó, and (10) Serra de Botucatu.

297

### 298 **Endemism correlation with elevation, marginality and climate**

299 All 19 bioclimatic variables analyzed presented significant differences between  
300 valleys and plateaus (Table 1). A total of 16 variables (84%) presented lower variances for  
301 plateaus than for valleys, suggesting that plateau climatic conditions were slightly more  
302 stable during the time periods that we compared. The other three variables displayed lower  
303 variances in valleys. Welch's two-sample t-test returned p-values lower than 0.01 for all  
304 comparisons. We observed a positive correlation for elevation and endemism, while distance  
305 to the core and endemism showed a negative correlation (Figure 2).

306

### 307 **Historical vegetation distribution**

308 The AUC for simulated datasets models was 0.736 for plateaus and 0.722 for valleys.  
309 For these data, our results recovered a pattern of glacial expansion for plateaus, while valleys  
310 presented glacial retraction in terms of suitability (Figure 3). In fact, the lowest proportional

311 distribution for valleys and the highest for plateaus occurred during the LGM (Figure 4). For  
312 real occurrence data, average AUC values were 0.892 for SDTF models, 0.956 for riverine  
313 forest models, 0.879 for gallery forest models and 0.915 for savanna models, indicating high  
314 predictive accuracy of models. We found that 38% of savanna species presented their  
315 maximum range during glacial periods, while gallery species, riverine species and SDTF  
316 species presented variable patterns (Figure 5; Appendices S1, S2, S3 and S4). For the forest  
317 vegetation types, 81% of the modeled riverine species displayed wider distribution ranges  
318 during interglacial periods. SDTF and gallery forests presented an opposite pattern to that of  
319 the riverine forests, with 72% of gallery forest species and 54% of SDTF species presenting  
320 their wider distribution during the LGM. With respect to the savanna, we found that 65.08%  
321 of the species presented wider LGM ranges than the present distribution. Combined models  
322 for all species binary distributions resulted in community-level reconstructions of vegetation  
323 types (Figure 5). For these combined reconstructions, we also observed a similar response of  
324 a wider occurrence of SDTF and gallery forests during the LIG and LGM, while the savanna  
325 presented a more local expansion within the Cerrado. Riverine forests, in comparison,  
326 presented a slightly narrower distribution during the LGM and were greatly restricted during  
327 the LIG.

328         The potential distribution of species from the different vegetation types indicated that  
329 suitable areas for the occurrence of species from the savanna, gallery forests, and riverine  
330 forests increased from LIG to LGM. Expansion for the savanna, however, was much more  
331 subtle than that for the gallery and riverine forests. In comparison, SDTF models showed a  
332 clearer retraction in overall species potential distribution, with a notable retraction in the  
333 LGM. From the mid-Holocene to the present scenario, potential areas for all vegetation types  
334 decreased.

335

336 **DISCUSSION**

337           We generated endemism maps for Cerrado woody plants and compared the patterns  
338 observed with biogeographical theories of the Cerrado, which assumed plateau/depression,  
339 stability/instability and core/peripheral processes involved in the generation of endemism.  
340 We demonstrated that the climate presented an overall higher stability in the plateaus than in  
341 the valleys. This stability, however, showed a weak correlation with endemism. Additionally,  
342 we reconstructed the distribution of these species and environments for the recent Quaternary  
343 period. We managed to link the distribution of higher endemism nuclei to elevation and  
344 centrality, reinforcing the importance of these elements in the biogeographic processes that  
345 generated the Cerrado diversity. For vegetation history reconstructions, we concluded that the  
346 savanna, a vegetation type associated with plateaus, expanded during the Last Glacial period,  
347 while the different valley vegetation types presented variable responses. With respect to  
348 valleys, SDTF retracted during the Last Glacial period, while riverine forests and gallery  
349 forests expanded. Moreover, we found evidence that plateaus configure stable scenarios for  
350 most climatic variables, but this stability is not necessarily linked with higher levels of  
351 endemism. In sequence, we discuss our results within the context of the climate changes,  
352 tectonic history and biogeographic processes of the domain.

353

354 **Elevation and marginality as predictors of endemism**

355           The identification of nuclei of endemism in Chapada dos Guimarães, Chapada dos  
356 Veadeiros, Serra do Cipó, and Distrito Federal is consistent with endemism patterns  
357 identified for other taxa (Simon & Proença 2000; Nogueira et al., 2011). Most of these areas  
358 are located at high elevation, with a single valley region (Vale do Araguaia) identified as  
359 highly endemic, supporting the results of our correlation analysis. Elevation, along with  
360 landscape compartmentalization, is considered an important driver of diversification



361 worldwide, as differences in elevation often promote isolation, a key process for speciation  
362 (Slaton, 2015). Although the concentration of endemism levels of plants at high elevations  
363 has already been suggested on a global scale (Steinbauer et al., 2016), a finer scale pattern for  
364 the Cerrado, as we presented here, reinforces the role of this relationship for this specific  
365 domain, as previously suggested (e.g., Fiaschi & Pirani, 2009).

366 In addition to elevation, marginality is also an important predictor of endemism. This  
367 pattern might be explained by the fact that species that are adapted to a particular  
368 environment tend to present higher survivability, reproductive success and population growth  
369 under their optimal conditions (Eckert et al., 2008). These conditions are gradually  
370 distributed across space and are expected to be more available in nuclear areas of  
371 distributions. This result is also supported by the higher historical suitability of nuclear region  
372 habitats for plants of the Cerrado, proposed by Bueno et al. (2017) and Costa et al. (2018).  
373 The real importance of interactions between marginality and endemism is controversial,  
374 however, as differential performances for nuclear populations have not been demonstrated by  
375 the available studies so far (Abeli, Gentili, Mondoni, Orsenigo, & Rossi, 2014; Pironon,  
376 Villellas, Morris, Doak, & García, 2015). However, we were able to demonstrate a  
377 convergence of endemism and centrality for the Cerrado. Hence, these variables are not  
378 independent of each other; due to the uplift of the Central Brazilian plateau in the late  
379 Miocene, the central region of Brazil displays considerably higher elevations than the  
380 marginal regions of the Cerrado (e.g., Werneck, 2011).

381

### 382 **Climate dynamics in the Cerrado, vegetation changes and climatic refugia**

383 The plateaus presented higher climatic stability for most (16) of the environmental  
384 variables included in our analysis. Valleys, comparatively, only presented lower variances  
385 than plateaus for annual mean temperature, precipitation seasonality, and precipitation of the

386 warmest month. The absence of a correlation between climatic stability and endemism is  
387 justified by the fact that although the climatic component is a major driver of species  
388 distribution, it does not determine the species distribution by itself. Distributions and range  
389 shifts are determined by complex interactions between abiotic and biotic components and  
390 species mobility (Soberón & Peterson, 2005). Therefore, constraints to dispersal, such as the  
391 heterogeneous landscape composition of the central Brazilian region, most likely configured  
392 fundamental barriers, shaping the distribution of the flora of the Cerrado throughout the  
393 Quaternary.

394 For the potential distribution models, we observed very similar patterns for simulated  
395 and real occurrence datasets of the savanna and plateau points, supporting the close  
396 association of this vegetation with highlands in the Cerrado. Our results differed, however,  
397 with the widespread savanna scenario in the LIG with posterior glacial retraction proposed by  
398 Bueno et al. (2017). Their models indicated a retraction for plateaus of the savanna during the  
399 LGM, which was interpreted as evidence of the role of the valleys as refugia during  
400 glaciations. Our models, in contrast, suggested a progressive retraction from the LGM to the  
401 present, with no significant glacial retraction, coinciding with the pollen registry for Central  
402 West Brazil (van der Hammen, 1974). Our interpretation of our results is that interglacial  
403 climates enhanced humidity, instead of glacial aridity, promoting retraction of the range of  
404 most species from the savanna formations of the Cerrado into interglacial refugia; this  
405 scenario was previously proposed for the lineage diversification of highland restricted dry-  
406 adapted taxa in the Cerrado, such as *Pilosocereus aurisetus* (Bonatelli et al., 2014) and  
407 *Tibouchina papyrus* (Collevatti et al., 2012).

408 While simulated dataset models fit the previously suggested (Werneck, 2011)  
409 scenario of glacial expansion under plateau and retraction under valley environmental  
410 conditions, real occurrence data models agreed with the savanna expansion but showed a

411 variety of responses for the different valley vegetation types. For the glacial scenario, most  
412 savanna, gallery forest, and riverine forest species presented expansion, while SDTF  
413 retracted. The closest relationships of riverine forests and gallery forests with rivers and  
414 watersheds (Ribeiro & Walter, 1998) are potential indicators that these species, although also  
415 occurring in valleys, show different tolerance and adaptation than species of SDTF. This may  
416 also be interpreted as an effect of the heterogeneity of climatic conditions observed for valley  
417 landscapes, which comprise more complex environmental gradients than plateaus. Our  
418 models support this assumption, indicating that even though the overall environmental space  
419 in valleys decreased during the LGM, riverine and gallery forests were able to expand their  
420 ranges. With respect to the mid-Holocene (6000 ybp), the driest phase of Central Brazil, most  
421 regions in South America maintained their vegetation types or experienced the advance of  
422 more arid/dry vegetation types (Marchant et al., 2009; Costa et al., 2018). As the savanna is  
423 the dominant vegetation type in plateaus (Silva & Bates, 2002; Werneck, 2011), the overall  
424 stability of savanna models during the climatic scenarios recovered for our models supports  
425 the assumption of more stable climates for these regions compared to valleys.

426         Among the vegetation types of valleys, riverine forests and gallery forests showed  
427 different responses than SDTF, which was coincident with the simulated dataset model for  
428 valleys. STDF models were consistent with a scenario of glacial retraction, followed by mid-  
429 Holocene expansion. Previous distribution models for SDTF also refuted the proposal of a  
430 wider distribution for this vegetation type during glacial periods (Werneck, Costa, Colli,  
431 Prado, & Sites, 2011). Our results differ from those of Werneck et al. (2011) by suggesting  
432 the expansion of SDTF during the LGM into the eastern corridor of the Amazon Basin, which  
433 was a scenario previously proposed by Pennington, Prado and Pendry (2000). The  
434 discrepancy between the simulated models and the species models is mostly associated with  
435 the fact that taxa associated with plateaus or valleys are not restricted to their environments,

436 as species often occur in different habitats than those to which they are mostly adapted, due  
437 to ecological plasticity (e.g., Hortal, Triantis, Meiri, Thébault, & Sfenthourakis, 2009). Using  
438 real occurrence data, we were able to identify a wide corridor in the eastern Amazon,  
439 potentially suitable for most savanna, SDTF and gallery forest species throughout the LGM,  
440 as well as gradually reduced suitability over the last 22,000 years. Although we noticed that  
441 models of species from the savanna and SDTF responded similarly to the simulated models,  
442 gallery and riverine forests did not. The variety of vegetation types occurring in valleys is  
443 also an indicator of the higher habitat diversity (Silva & Bates, 2002) and, possibly, of a  
444 complex biogeographic history, which may not be fully explained by a single vegetation  
445 response model.

446

## 447 **CONCLUSION**

448 We conclude that climatic stability alone is not able to predict endemism distribution  
449 in the Cerrado, which is mostly strongly correlated with the elevation and centrality of the  
450 environments in this domain. The majority of endemics is concentrated in higher elevation  
451 nuclear regions, while peripheral depressions present lower endemism levels. The Quaternary  
452 climate was indeed more stable in plateaus than in valleys, which demonstrates the overlap of  
453 these hypotheses. We conclude that the three hypotheses interacted in the origin and  
454 distribution of the diversity of the domain, with different magnitudes. Additionally, we  
455 demonstrate how the different vegetation types of the Cerrado responded individually to the  
456 climatic shifts of the last 130,000 years. We expect our results to provide new hypotheses and  
457 possible scenarios for further investigations about how past climatic changes affected the  
458 endemism distribution of Neotropical biota. By demonstrating that vegetation types across a  
459 domain may present differential responses to climatic changes, we recommend that  
460 approaches in reconstructions aiming to estimate the impacts of future climatic changes on

461 wider scales take in account the different patterns of responses of these vegetation types.

462 Additionally, we recommend further studies on community-level approaches, as we

463 implemented here, with other organisms, to test the extent of our interpretations.

464

465 **REFERENCES**

- 466 Ab'Sáber, A. N. (1983). O domínio dos cerrados: introdução ao conhecimento. *Revista do*  
467 *Serviço Público*, 111, 41–55.
- 468 Abeli, T., Gentili, R., Mondoni, A., Orsenigo, S. & Rossi, G. (2014). Effects of marginality  
469 on plant population performance. *Journal of Biogeography*, 41, 239–249. doi:  
470 10.1111/jbi.12215.
- 471 Arruda, D. M., Schaefer, C. E. G. R., Fonseca, R. S., Solar, R. R. C. & Fernandes-Filho, E. I.  
472 (2018). Vegetation cover of Brazil in the last 21 ka: new insights into the Amazonian  
473 refugia and Pleistocenic arc hypotheses. *Global Ecology and Biogeography*, 27, 47–  
474 56. doi: 10.1111/geb.12646.
- 475 Bonaccorso, E., Koch, I. & Peterson, A. T. (2006). Pleistocene fragmentation of Amazon  
476 species' ranges. *Diversity & Distributions*, 12, 157–164. doi: 10.1111/j.1366-  
477 9516.2005.00212.x.
- 478 Bonatelli, I. A. S., Perez, M. F., Peterson, A. T., Taylor, N. P., Zappi, D. C., Machado, M. C.,  
479 ... Moraes, E. M. (2014). Interglacial microrefugia and diversification of a cactus  
480 species complex: phylogeography and palaeodistributional reconstructions for  
481 *Pilosocereus aurisetus* and allies. *Molecular Ecology*, 23, 3044–3063. doi:  
482 10.1111/mec.12780.
- 483 Bueno, M. L., Pennington, R. T., Dexter, K. G., Kamino, L. H. Y., Pontara, V., Neves, D. M.,  
484 ... de Oliveira-Filho, A. T. (2017). Effects of Quaternary climatic fluctuations on the  
485 distribution of Neotropical savanna tree species. *Ecography*, 40, 403–414. doi:  
486 10.1111/ecog.01860.
- 487 Carnaval, A. C. & Moritz, C. (2008). Historical climate modelling predicts patterns of current  
488 biodiversity in the Brazilian Atlantic forest. *Journal of Biogeography*, 35, 1187–1201.  
489 doi: 10.1111/j.1365-2699.2007.01870.x.

- 490 Carnaval, A. C., Hickerson, M. J., Haddad, C. F., Rodrigues, M. T. & Moritz, C. (2009).  
491 Stability predicts genetic diversity in the Brazilian Atlantic forest hotspot. *Science*,  
492 323, 785–789. doi: 10.1126/science.1166955.
- 493 Chamberlain, S., Ram, K., Barve, V. & Mcglinn, D. (2016) *Rgbif: Interface to the Global*  
494 *Biodiversity Information Facility API. R Package Version 0.9.2.*
- 495 Collevatti, R. G., de Castro, T. G., de Souza Lima, J. & de Campos Telles, M. P. (2012).  
496 Phylogeography of *Tibouchina papyrus* (Pohl) Toledo (Melastomataceae), an  
497 endangered tree species from rocky savannas, suggests bidirectional expansion due to  
498 climate cooling in the Pleistocene. *Ecology and Evolution*, 2, 1024–1035. doi:  
499 10.1002/ece3.236.
- 500 Costa, G. C., Hampe, A., Ledru, M. P., Martinez, P. A., Mazzochini, G. G., Shepard, D. B.,  
501 ... Carnaval, A. C. (2018). Biome stability in South America over the last 30 kyr:  
502 inferences from long-term vegetation dynamics and habitat modelling. *Global*  
503 *Ecology and Biogeography*, 27, 285–297. doi: 10.1111/geb.12694.
- 504 da Silva, J. M. C. & Bates, J. M. (2002). Biogeographic patterns and conservation in the  
505 South American Cerrado: a tropical savanna hotspot. *BioScience*, 52, 225.
- 506 da Silva, J. M. C. (1997). Endemic bird species and conservation in the Cerrado Region,  
507 South America. *Biodiversity and Conservation*, 6, 435–450. doi:  
508 10.1023/A:1018368809116.
- 509 de Siqueira, M. F. & Peterson, A. T. (2003). Consequences of global climate change for  
510 geographic distributions of Cerrado tree species. *Biota Neotropica*, 3, 1–14.
- 511 Eckert, C. G., Samis, K. E. & Loughheed, S. C. (2008). Genetic variation across species'  
512 geographical ranges: the central-marginal hypothesis and beyond. *Molecular Ecology*,  
513 17, 1170–1188. doi: 10.1111/j.1365-294X.2007.03659.x.

- 514 Fiaschi, P. & Pirani, J. R. (2009). Review of plant biogeographic studies in Brazil. *Journal of*  
515 *Systematics and Evolution*, 47, 477–496. doi: 10.1111/j.1759-6831.2009.00046.x.
- 516 Guerin, G. R., Ruokolainen, L. & Lowe, A. J. (2015). A georeferenced implementation of  
517 weighted endemism. *Methods in Ecology and Evolution*, 6, 845–852. doi:  
518 10.1111/2041-210X.12361.
- 519 Harrison, S. & Noss, R. (2017). Endemism hotspots are linked to stable climatic refugia.  
520 *Annals of Botany*, **119**, 207–214. doi: 10.1093/aob/mcw248.
- 521 Hijmans, R. J. & van Etten, J. (2014) *Raster: Geographic Data Analysis and Modeling. R*  
522 *Package Version 2*.
- 523 Hijmans, R. J., Cameron, S. E., Parra, J. L., Jones, P. G. & Jarvis, A. (2005). Very high  
524 resolution interpolated climate surfaces for global land areas. *International Journal of*  
525 *Climatology*, 25, 1965–1978. doi: 10.1002/joc.1276.
- 526 Hijmans, R. J., Phillips, S., Leathwick, J. & Elith, J. (2013) *Dismo: Species Distribution*  
527 *Modeling. R Package Version 0.9–3*.
- 528 Hortal, J., Triantis, K. A., Meiri, S., Thébault, E. & Sfenthourakis, S. (2009). Island species  
529 richness increases with habitat diversity. *American Naturalist*, 174, E205–E217. doi:  
530 10.1086/645085.
- 531 Klink, C. A. & Machado, R. B. (2005). Conservation of the Brazilian Cerrado. *Conservation*  
532 *Biology*, 19, 707–713. doi: 10.1111/j.1523-1739.2005.00702.x.
- 533 Ledru, M. P. (2002). Late Quaternary history and evolution of the Cerrados as revealed by  
534 palynological records. In: P.S. Oliveira, R.J. Marquis (Eds.), *The Cerrados of Brazil:*  
535 *ecology and natural history of a neotropical savanna* (Vol. 1, pp. 33–50). New York,  
536 NY: Columbia University Press.
- 537 Lima, J. S., Telles, M. P. C., Chaves, L. J., Lima-Ribeiro, M. S., Collevatti, R. G.  
538 (2017). Demographic stability and high historical connectivity explain the diversity of



- 539 a savanna tree species in the Quaternary. *Annals of Botany*, 119, 645–657. doi:  
540 10.1093/aob/mcw257.
- 541 Marchant, R., Cleef, A., Harrison, S. P., Hooghiemstra, H., Markgraf, V., van Boxel, J., ...  
542 Wille, M. (2009). Pollen-based biome reconstructions for Latin America at 0, 6000  
543 and 18 000 radiocarbon years ago. *Climate of the Past*, 5, 725–767. doi: 10.5194/cp-  
544 5-725-2009.
- 545 Mendonça, R. C., Felfili, J. M., Walter, B. M. T., Júnior, M. C. S., Rezende, A. V.,  
546 Filgueiras, T. S. & Nogueira, P. E. (1998). Flora vascular do Cerrado. In S. M. Sano  
547 & S. P. Almeida (Eds.), *Cerrado: Ambiente e Flora* (Vol. 1, pp. 289–556). Brasília,  
548 DF: EMBRAPA.
- 549 Nogueira, C., Ribeiro, S., Costa, G. C., Colli, G. R. (2011). Vicariance and endemism in a  
550 Neotropical savanna hotspot: distribution patterns of Cerrado squamate reptiles.  
551 *Journal of Biogeography*, 38, 1907–1922. doi: 10.1111/j.1365-2699.2011.02538.x.
- 552 Oliveira-Filho, A. T. (2017) *NeoTropTree, Flora arbórea da Região Neotropical: um banco*  
553 *de dados envolvendo biogeografia, diversidade e conservação*. Universidade Federal  
554 de Minas Gerais. <<http://www.neotroptree.info>>.
- 555 Otto-Bliesner, B. L., Marshall, S. J., Overpeck, J. T., Miller, G. H. & Hu, A. (2006).  
556 Simulating arctic climate warmth and icefield retreat in the Last Interglaciation.  
557 *Science*, 311, 1751–1753. doi: 10.1126/science.1120808.
- 558 Pearson, R. G., Raxworthy, C. J., Nakamura, M. & Townsend Peterson, A. (2007). Predicting  
559 species distributions from small numbers of occurrence records: a test case using  
560 cryptic geckos in Madagascar. *Journal of Biogeography*, 34, 102–117.
- 561 Pennington, R. T., Prado, D. E. & Pendry, C. A. (2000). Neotropical seasonally dry forests  
562 and Quaternary vegetation changes. *Journal of Biogeography*, 27, 261–273. doi:  
563 10.1046/j.1365-2699.2000.00397.x.

- 564 Phillips, S. J., Anderson, R. P. & Schapire, R. E. (2006). Maximum entropy modeling of  
565 species geographic distributions. *Ecological Modelling*, 190, 231–259. doi:  
566 10.1016/j.ecolmodel.2005.03.026.
- 567 Pironon, S., Villellas, J., Morris, W. F., Doak, D. F. & García, M. B. (2015). Do geographic,  
568 climatic or historical ranges differentiate the performance of central versus peripheral  
569 populations? *Global Ecology and Biogeography*, 24, 611–620. doi:  
570 10.1111/geb.12263.
- 571 Prado, D. E. & Gibbs, P. E. (1993). Patterns of species distributions in the dry seasonal  
572 forests of South America. *Annals of the Missouri Botanical Garden*, 80, 902–927. doi:  
573 10.2307/2399937.
- 574 Ribeiro, J. F. & Walter, B. M. T. (1998). Fitofisionomias do bioma Cerrado. In S.M. Sano &  
575 S.P. Almeida (Ed.), *Cerrado: ambiente e flora* (pp. 87–166). Brasília: Embrapa  
576 Cerrados.
- 577 Santos, M. G., Nogueira, C., Giugliano, L. G., Colli, G. R. (2014). Landscape evolution and  
578 phylogeography of *Micrablepharus atticolus* (Squamata, Gymnophthalmidae), an  
579 endemic lizard of the Brazilian Cerrado. *Journal of Biogeography*, 41, 1506–1519.  
580 doi: 10.1111/jbi.12291.
- 581 Simon, M. F. & Proença, C. (2000). Phytogeographic patterns of *Mimosa* (Mimosoideae,  
582 Leguminosae) in the Cerrado biome of Brazil: an indicator genus of high-altitude  
583 centers of endemism? *Biological Conservation*, 96, 279–296. doi: 10.1016/S0006-  
584 3207(00)00085-9.
- 585 Slaton, M. R. (2015). The roles of disturbance, topography and climate in determining the  
586 leading and rear edges of population range limits. *Journal of Biogeography*, 42, 255–  
587 266. doi: 10.1111/jbi.12406.

- 588 Soberón, J. & Peterson, A. T. (2005). Interpretation of models of fundamental ecological  
589 niches and species' distributional areas. *Biodiversity Informatics*, 2, 9–32. doi:  
590 10.17161/bi.v2i0.4.
- 591 Soule, M. (1973). The epistasis cycle: a theory of marginal populations. *Annual Review of*  
592 *Ecology and Systematics*, 4, 165–187. doi: 10.1146/annurev.es.04.110173.001121.
- 593 Steinbauer, M. J., Field, R., Grytnes, J. A., Trigas, P., Ah-Peng, C., Attorre, F., ...  
594 Beierkuhnlein, C. (2016). Topography-driven isolation, speciation and a global  
595 increase of endemism with elevation. *Global Ecology and Biogeography*, 25, 1097–  
596 1107. doi: 10.1111/geb.12469.
- 597 Svenning, J. C., Normand, S. & Kageyama, M. (2008). Glacial refugia of temperate trees in  
598 Europe: insights from species distribution modelling. *Journal of Ecology*, 96, 1117–  
599 1127. doi: 10.1111/j.1365-2745.2008.01422.x.
- 600 Thuiller, W. (2004). Patterns and uncertainties of species' range shifts under climate change.  
601 *Global Change Biology*, 10, 2020–2027.
- 602 Turchetto-Zolet, A. C., Pinheiro, F., Salgueiro, F. & Palma-Silva, C. (2013).  
603 Phylogeographical patterns shed light on evolutionary process in South America.  
604 *Molecular Ecology*, 22, 1193–1213. doi: 10.1111/mec.12164.
- 605 van der Hammen, T. (1974). The Pleistocene changes of vegetation and climate in tropical  
606 South America. *Journal of Biogeography*, 1, 3. doi: 10.2307/3038066.
- 607 Welch, B. L. (1938). The significance of the difference Between two means when the  
608 population variances are unequal. *Biometrika*, 29, 350–362. doi: 10.1093/biomet/29.3-  
609 4.350.
- 610 Werneck, F. P. (2011). The diversification of eastern South American open vegetation  
611 biomes: historical biogeography and perspectives. *Quaternary Science Reviews*, 30,  
612 1630–1648. doi: 10.1016/j.quascirev.2011.03.009.

- 613 Werneck, F. P., Costa, G. C., Colli, G. R., Prado, D. E. & Sites Jr, J. W. (2011). Revisiting  
614 the historical distribution of Seasonally Dry Tropical Forests: new insights based on  
615 palaeodistribution modelling and palynological evidences. *Global Ecology and*  
616 *Biogeography*, 20, 272–288.
- 617 Werneck, F. P., Nogueira, C., Colli, G. R., Sites, J. W. & Costa, G. C. (2012). Climatic  
618 stability in the Brazilian Cerrado: implications for biogeographical connections of  
619 South American savannas, species richness and conservation in a biodiversity hotspot.  
620 *Journal of Biogeography*, 39, 1695–1706. doi: 10.1111/j.1365-2699.2012.02715.x.
- 621

622 **Data accessibility statement:** The weighted endemism raster data generated in this study are  
623 available as raster grids from the Pangaea database: [https://issues.pangaea.de/browse/PDI-](https://issues.pangaea.de/browse/PDI-17312)  
624 [17312](https://issues.pangaea.de/browse/PDI-17312). The GBIF material list used for the endemism maps and models is available as  
625 supplementary material.  
626

627 **Table 1.** Mean values and confidence intervals of the variances of 19 bioclimatic variables  
 628 for valley and plateau environments in the Brazilian Cerrado based on 1000 bootstrap  
 629 replicates. Variances were calculated by comparing cell values for 1000 random points within  
 630 each landscape unity for the present, mid-Holocene (6,000 years before present), Last Glacial  
 631 Maximum (22,000 years before present), and Last Interglacial (130,000 years before present).  
 632 *t-values*: t-values calculated with a paired t-test. (\*) p-value > 0.01.

| Variable | Description                         | Valleys |        | Plateaus |        | t-value |
|----------|-------------------------------------|---------|--------|----------|--------|---------|
|          |                                     | Mean    | 95% ci | Mean     | 95% ci |         |
| bio1     | Mean Annual Temperature             | 386     | 6      | 392      | 7      | 27 *    |
| bio2     | Mean Diurnal Range                  | 132     | -19    | 113      | -20    | -221 *  |
| bio3     | Isothermality                       | 22      | -5     | 16       | -5     | -440 *  |
| bio4     | Temperature Seasonality             | 28558   | -      | 20304    | -      | -538 *  |
| bio5     | Max. Temperature of Warmest Month   | 2       | 82242  | 0        | 82843  | -538 *  |
| bio5     | Min. Temperature of Coldest Month   | 569     | 47     | 615      | 46     | 152 *   |
| bio6     | Annual Temperature Range            | 909     | -232   | 676      | -234   | -501 *  |
| bio7     | Mean Temperature of Wettest Quarter | 468     | -139   | 329      | -140   | -469 *  |
| bio8     | Mean Temperature of Driest Quarter  | 282     | 47     | 329      | 46     | 287 *   |
| bio9     | Mean Temperature of Warmest Quarter | 820     | -115   | 705      | -116   | -252 *  |
| bio10    | Mean Temperature of Coldest Quarter | 422     | -6     | 416      | -7     | -31 *   |
| bio11    | Annual Precipitation                | 555     | -29    | 525      | -30    | -81 *   |
| bio12    | Precipitation of Wettest Month      | -       | -      | -        | -      | -       |
| bio12    | Precipitation of Driest Month       | 89629   | 18262  | 71271    | 18455  | -373 *  |
| bio13    | Precipitation of Driest Month       | 3440    | -1174  | 2263     | -1180  | -764 *  |
| bio14    | Precipitation Seasonality           | 137     | -44    | 92       | -45    | -313 *  |
| bio15    | Precipitation of Wettest Quarter    | 194     | -45    | 149      | -45    | -304 *  |
| bio16    | Precipitation of Driest Quarter     | 25724   | -9928  | 15775    | -9970  | -923 *  |
| bio17    | Precipitation of Warmest Quarter    | 1871    | -623   | 1245     | -630   | -338 *  |
| bio18    | Precipitation of Coldest Quarter    | 46822   | -9568  | 37211    | -9655  | -431 *  |
| bio19    | Precipitation of Coldest Quarter    | 58886   | 28905  | 29912    | 29043  | -821 *  |

633

634 **Table 2.** Generalized linear model for endemism, elevation, marginality and variances of  
 635 bioclimatic variables among the Last Interglacial, Last Glacial Maximum, mid-Holocene and  
 636 present.

|             | Description                         | Estimate  | Std. error | t-value | Pr(> t ) |    |
|-------------|-------------------------------------|-----------|------------|---------|----------|----|
| (Intercept) |                                     | 9.14E-02  | 4.24E-02   | 2.156   | 0.031    |    |
|             |                                     | 1.30E-04  | 1.39E-05   | 9.406   | <2e-16   | *  |
| Elevation   |                                     | -1.13E-07 | 1.01E-08   | 11.18   | <2e-16   | ** |
| Marginality | Distance to centroid                | 1.09E-05  | 2.48E-04   | 0.044   | 0.964    |    |
| bio1        | Mean Annual Temperature             | -2.09E-04 | 2.54E-04   | 0.825   | 0.409    |    |
| bio2        | Mean Diurnal Range                  | -4.65E-04 | 5.89E-04   | 0.789   | 0.429    |    |
| bio3        | Isothermality                       | 1.28E-08  | 4.26E-08   | 0.301   | 0.763    |    |
| bio4        | Temperature Seasonality             | -7.00E-05 | 3.97E-05   | 1.763   | 0.078    |    |
| bio5        | Max. Temperature of Warmest Month   | -7.21E-05 | 7.96E-05   | 0.906   | 0.365    |    |
| bio6        | Min. Temperature of Coldest Month   | 8.14E-05  | 7.38E-05   | 1.104   | 0.269    |    |
| bio7        | Annual Temperature Range            | 1.14E-04  | 8.39E-05   | 1.354   | 0.175    |    |
| bio8        | Mean Temperature of Wettest Quarter | -4.92E-05 | 8.67E-05   | 0.567   | 0.570    |    |
| bio9        | Mean Temperature of Driest Quarter  | 4.50E-05  | 8.47E-05   | 0.532   | 0.595    |    |
| bio10       | Mean Temperature of Warmest Quarter | 1.04E-04  | 1.01E-04   | 1.028   | 0.304    |    |
| bio11       | Mean Temperature of Coldest Quarter | 1.12E-06  | 1.08E-06   | 1.04    | 0.298    |    |
| bio12       | Annual Precipitation                | 4.85E-06  | 8.27E-06   | 0.586   | 0.557    |    |
| bio13       | Precipitation of Wettest Month      | -2.86E-04 | 3.44E-04   | 0.833   | 0.404    |    |
| bio14       | Precipitation of Driest Month       | 2.01E-05  | 2.77E-05   | 0.073   | 0.942    |    |
| bio15       | Precipitation Seasonality           | -2.31E-06 | 2.11E-06   | 1.097   | 0.273    |    |
| bio16       | Precipitation of Wettest Quarter    | 8.16E-06  | 2.94E-06   | 0.277   | 0.781    |    |
| bio17       | Precipitation of Driest Quarter     | 2.17E-07  | 1.33E-07   | 1.63    | 0.103    |    |
| bio18       | Precipitation of Warmest Quarter    |           |            |         | 2        |    |

|     |       |                                  |          |          |       |       |
|-----|-------|----------------------------------|----------|----------|-------|-------|
| 637 | bio19 | Precipitation of Coldest Quarter | 6.99E-08 | 9.61E-08 | 0.727 | 0.467 |
|-----|-------|----------------------------------|----------|----------|-------|-------|



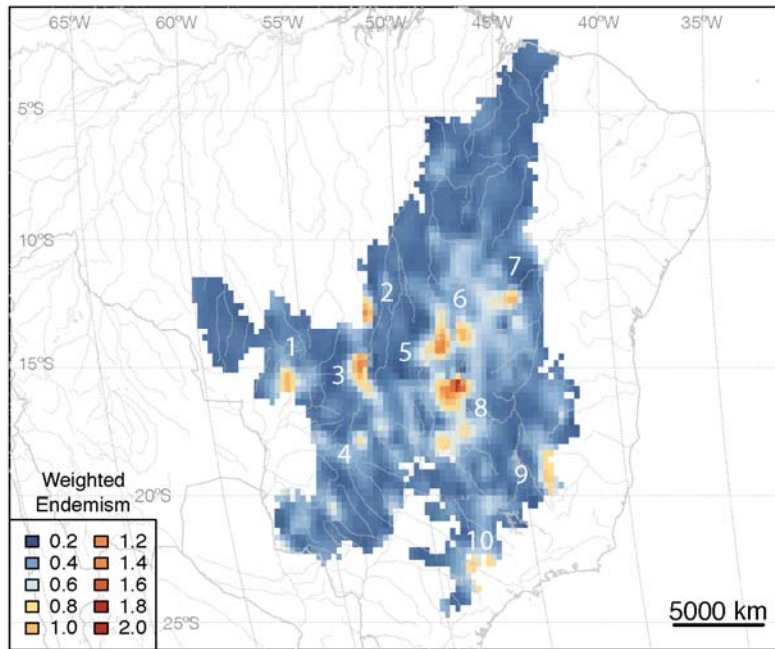

638

639 **Figure 1.** Weighted endemism (Guerín et al., 2015) map for woody species of the Cerrado  
640 domain. Grid cells are  $0.25 \times 0.25$  degrees wide. Map in Mollweide projection. Numbers  
641 indicate geographic regions with higher endemism, identified as the following: (1) Chapada  
642 dos Guimarães; (2) Serra do Roncador; (3) Araguaia Valley; (4) Chapada das Emas; (5) Serra  
643 dos Pirineus; (6) Chapada dos Veadeiros; (7) Chapada do São Francisco; (8) Planalto do  
644 Distrito Federal; (9) Serra do Cipó; (10) Serra de Botucatu.

645

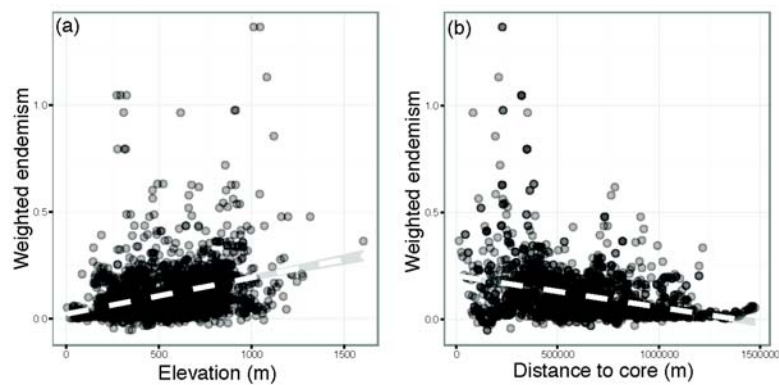

646

647 **Figure 2.** Linear models showing the correlation between weighted endemism, elevation, and

648 distance to the core. (a) Weighted endemism vs. elevation; (b) Weighted endemism vs.

649 distance to the core.

650

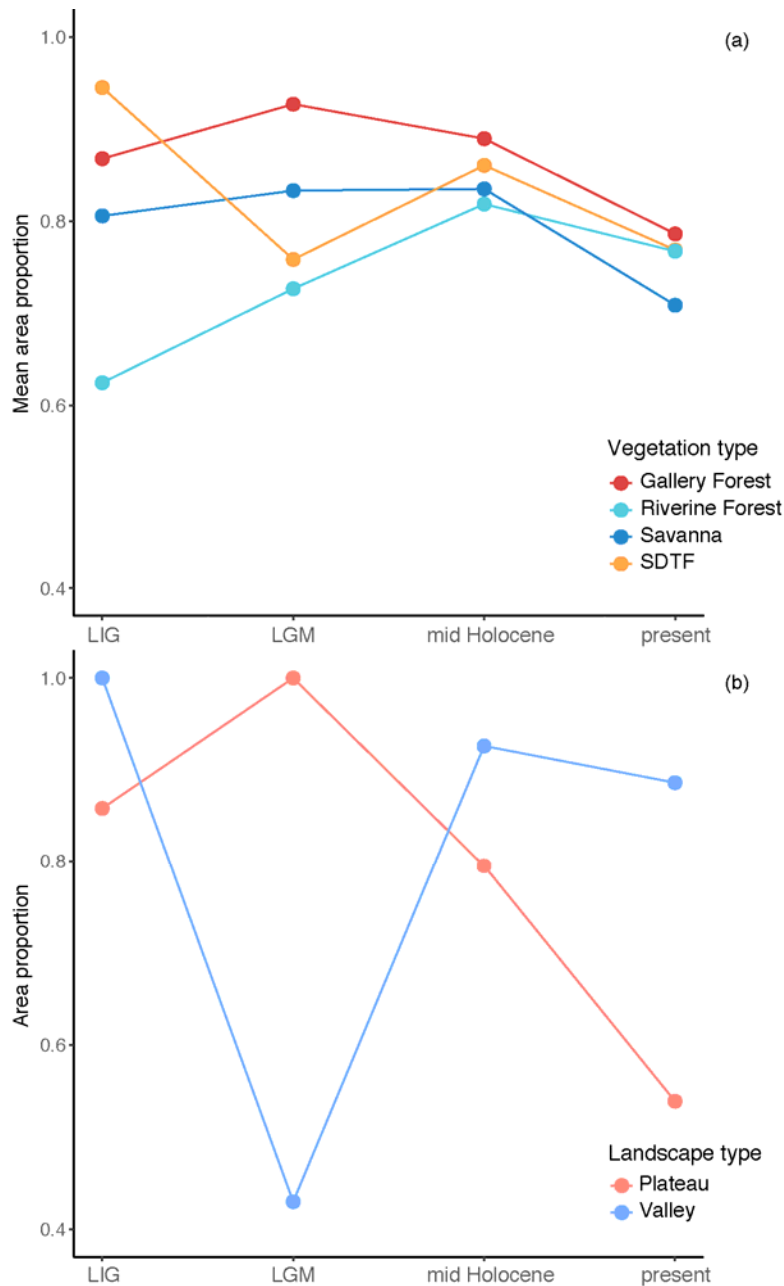

651

652 **Figure 3.** Potential suitable area for vegetation types of the Cerrado and environmental  
653 spaces for valley and plateau biotas based on simulated and real occurrence species dataset  
654 models of presence/absence generated with Maxent (Phillips et al., 2006). (a) Mean area  
655 proportion of species for each vegetation type calculated by the relative size of the predicted  
656 presence area compared to the observed maximum range for each landscape unit among the

657 four modeled scenarios. (b) Estimated environmental space proportion for plateaus and

658 valleys among the four modeled scenarios.

659

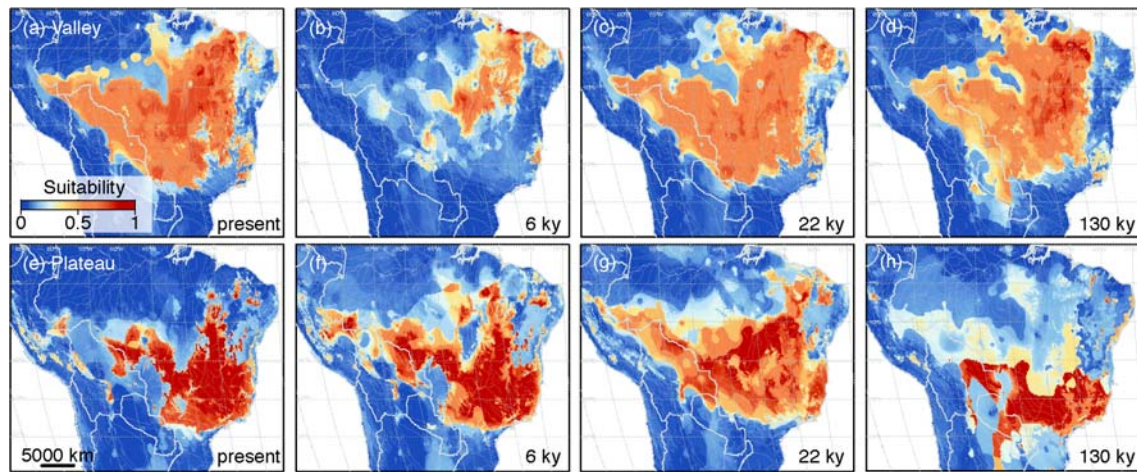

660

661 **Figure 4.** Potential suitable area for valley and plateau biotas of the Cerrado domain based on

662 simulated dataset models of presence/absence generated with Maxent (Phillips et al., 2006).

663 The area proportion is the relative size of the predicted presence compared to the maximum

664 observed range for each landscape unit among the four modeled scenarios.

665

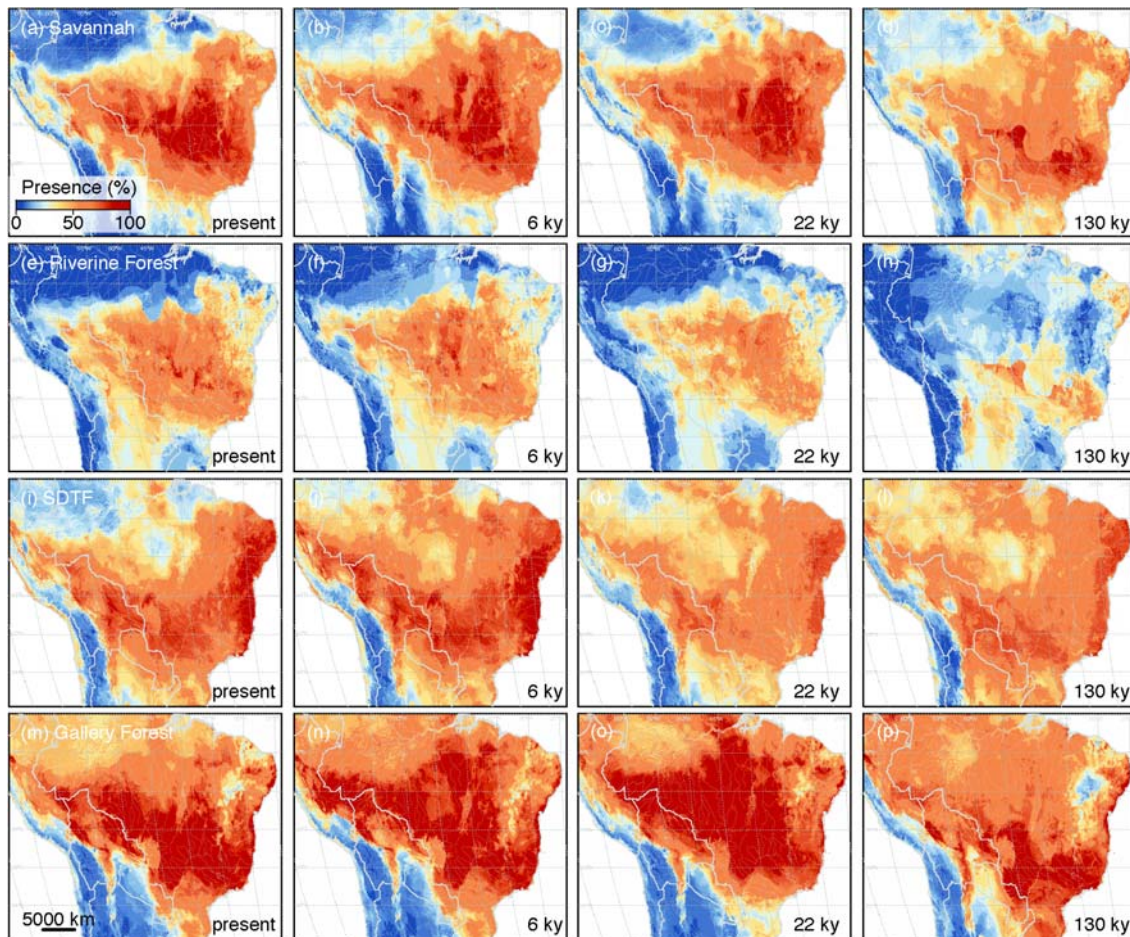

666

667 **Figure 5.** Potential suitable area for valley and plateau biotas of the Cerrado domain based on

668 simulated dataset models of presence/absence generated with Maxent (Phillips et al., 2006).

669 The area proportion is the relative size of the predicted presence compared to the maximum

670 observed range for each landscape unit among the four modeled scenarios.

671

672
